# Supplementary material for: Protective Role of Hepassocin against Hepatic Endoplasmic Reticulum Stress in Mice
Source: MDPI journal article supplement (doi:10.3390/ijms232113325), 2022-11-01
Supplement: s1 [file s1]

Supplementary Table S2: Sequences of primers used for quantitative PCR.

| Gene name          | Forward (5'-3')            | Reverse (5'-3')             |
|--------------------|----------------------------|-----------------------------|
| <i>Acc1</i>        | ATGGGCGGAATGGTCTCTTTC      | TGGGGACCTTGTCTTCATCAT       |
| <i>Atf4</i>        | GGGTTCTGTCTTCCACTCCA       | AAGCAGCAGAGTCAGGCTTTC       |
| <i>Atf6</i>        | GACTCACCCATCCGAGTTGTG      | CTCCCAGTCTTCATCTGGTCC       |
| <i>Cd36</i>        | ATGGGCTGTGATCGGAACTG       | GTCTTCCCAATAAGCATGTCTC<br>C |
| <i>Chop</i>        | CTGGAAGCCTGGTATGAGGAT      | CAGGGTCAAGAGTAGTGAAGG<br>T  |
| <i>Chop (h)</i>    | GGAAACAGAGTGGTCATTCCC      | CTGCTTGAGCCGTTTATTCTC       |
| <i>Cpt1</i>        | CTCCGCCTGAGCCATGAAG        | CACCAGTGATGATGCCATTCT       |
| <i>Derl3</i>       | AGGAGGGTTCTTTCCGTGG        | ACGGCTCCATACATAGACCAG       |
| <i>Derl3 (h)</i>   | AGGTCTGGAGGCTCGTCAC        | GCAGTAGCGGAACACGAAGAG       |
| <i>Erdj4</i>       | AAATAAAAGCCCTGATGCTGA<br>A | CTATTGGCATCCGAGAGTGTTT      |
| <i>Erdj4 (h)</i>   | TCTTAGGTGTGCCAAAATCGG      | TGTCAGGGTGGTACTTCATGG       |
| <i>Fasn</i>        | GGAGGTGGTGATAGCCGGTAT      | TGGGTAATCCATAGAGCCCAG       |
| <i>Fatp2</i>       | TCCTCCAAGATGTGCGGTACT      | TAGGTGAGCGTCTCGTCTCG        |
| <i>Fatp5</i>       | CTACGCTGGCTGCATATAGATG     | CCACAAAGGTCTCTGGAGGAT       |
| <i>Grp78</i>       | ACTTGGGGACCACCTATTCCT      | ATCGCCAATCAGACGCTCC         |
| <i>Grp78 (h)</i>   | GAAAGAAGGTTACCCATGCAG<br>T | CAGGCCATAAGCAATAGCAGC       |
| <i>Herpud1</i>     | AGCAGCCGGACAACTCTAAT       | CTTGAAAGTCTGCTGGACA         |
| <i>Herpud1 (h)</i> | TGCTGGTTCTAATCGGGGACA      | CCAGGGGAAGAAAGGTTCCG        |
| <i>Hrd1</i>        | CCTGGGACAACAAGGCTGTA       | AGCTTTCTTGAACTGCCTCATG      |
| <i>Hrd1 (h)</i>    | CTTCACCGTTTTTCGGGATGA      | CCAGGAGGAACATAAGAGAGA<br>CA |

|                       |                                |                             |
|-----------------------|--------------------------------|-----------------------------|
| <i>HPS</i>            | GATTTACAGCTTCGTCCTGG           | TCTTGCCTCCAAGGTCAATG        |
| <i>HPS (h)</i>        | ATGGCAAAGGTGTTTCAGTTTCA        | ACAATCTGCATACTGCCTCTTG      |
| <i>Hsp40</i>          | TTCGACCGCTATGGAGAGGAA          | CACCGAAGAACTCAGCAAACA       |
| <i>Hsp90</i>          | TGTTGCGGTACTACACATCTGC         | GTCCTTGGTCTCACCTGTGATA      |
| <i>Mttp</i>           | CTCTTGGCAGTGCTTTTTCTCT         | GAGCTTGTATAGCCGCTCATT       |
| <i>Ppara</i>          | AGAGCCCCATCTGTCCTCTC           | ACTGGTAGTCTGCAAAACCAAA      |
| <i>Scd1</i>           | GTACCGCTGGCACATCAACTT          | GGCTAAGACAGTAGCCTTAG        |
| <i>Spliced-Xbp1</i>   | CTGAGTCCGAATCAGGTGCAG          | GTCCATGGGAAGATGTTCTGG       |
| <i>Srebp1</i>         | GGAGCCATGGATTGCACATT           | GGCCCGGGAAGTCACTGT          |
| <i>Tbp</i>            | AGAACAATCCAGACTAGCAGC<br>A     | GGGAACTTCACATCACAGCTC       |
| <i>Tbp (h)</i>        | CCACTCACAGACTCTCACAAC          | CTGCGGTACAATCCCAGAACT       |
| <i>Unspliced Xbp1</i> | AGCAGCAAGTGGTGGATTTG           | GAGTTTTCTCCCGTAAAAGCTG<br>A |
| <i>Wfs1</i>           | CGGGAAGAAACGGACAGAGC           | CGTAGGTAGTGTTTGCCAC         |
| <i>Xbp1</i>           | GACAGAGAGTCAAACAACTAACGT<br>GG | GTCCAGCAGGCAAGAAGGT         |
| <i>Serca</i>          | GAGAACGCTCACACAAAGACC          | CAATTCGTTGGAGCCCCAT         |
| <i>Stim1</i>          | TGACAGGGACTGTACTGAAGATG        | TATGCCGAGTCAAGAGAGGAG       |
| <i>Ncx</i>            | CGCTGGGGAAGATGACGATG           | TGGGACGAAGGCAAACAGAAC       |
| <i>Ip3r</i>           | CGTTTTGAGTTTGAAGGCGTTT         | CATCTTGCGCCAATTCCCG         |
| <i>Orai</i>           | GATCGGCCAGAGTTACTCCG           | TGGGTAGTCATGGTCTGTGTC       |

(h) show that the primer sequence is suitable for detection of human gene.
