# Supplementary material for: Protective Role of Hepassocin against Hepatic Endoplasmic Reticulum Stress in Mice
Source: MDPI journal article supplement (doi:10.3390/ijms232113325), 2022-11-01
Supplement: s1 [file s1]

Supplementary Table S1: Antibodies used for immunoblot

| Protein name                                                          | UniProtKB No. | Antibody                                                 | Identifier                          | Dilution |
|-----------------------------------------------------------------------|---------------|----------------------------------------------------------|-------------------------------------|----------|
| 78 kDa glucose-regulated protein (GRP78)                              | P20029        | Rabbit polyclonal GRP78 antibody                         | Abcam, ab21685                      | 1:400    |
| C/EBP-homologous protein (CHOP)                                       | P35639        | mouse monoclonal CHOP antibody                           | Abcam, ab11419                      | 1:400    |
| PRKR-like endoplasmic reticulum kinase (PERK)                         | Q9Z2B5        | rabbit monoclonal PERK antibody                          | Abcam, ab229912                     | 1:400    |
| Eukaryotic translation initiation factor 2 subunit 1 (eIF2 $\alpha$ ) | Q6ZWX6        | rabbit monoclonal eIF2 $\alpha$ antibody                 | Abcam, ab169528                     | 1:400    |
| Cyclic AMP-dependent transcription factor ATF-4 (ATF4)                | Q06507        | rabbit polyclonal ATF4 antibody                          | Abcam, ab23760                      | 1:400    |
| Phospho-PERK (P-PERK)                                                 | N/A           | Rabbit monoclonal PERK (phospho T980) antibody           | Cell Signaling Technology, 3179     | 1:400    |
| Phospho-eIF2 $\alpha$ (P-eIF2 $\alpha$ )                              | N/A           | rabbit polyclonal EIF2 $\alpha$ (phospho S51) antibody   | Cell Signaling Technology, 9721     | 1:400    |
| Caspase-9 (CASP-9)                                                    | Q8C3Q9        | rabbit polyclonal Caspase-9 antibody                     | Cell Signaling Technology, 9504     | 1:600    |
| Apoptosis regulator Bcl-X (Bcl-XL)                                    | Q9QWX2        | rabbit monoclonal Bcl-XL antibody                        | Cell Signaling Technology, 2764     | 1:600    |
| Apoptosis regulator BAX (BAX)                                         | Q07813        | rabbit monoclonal Bax antibody                           | Cell Signaling Technology, 5023#    | 1:600    |
| Hepassocin (HPS)                                                      | Q71KU9        | Rabbit polyclonal HPS antibody                           | Thermo Fisher Scientific, PA5-30030 | 1:500    |
| CCAAT/enhancer-binding protein beta (CEBPB)                           | P28033        | Rabbit monoclonal CEBP Beta antibody [E299] - C-terminal | Abcam ab32358                       | 1:1000   |
| Sterol regulatory element-binding protein 1 (SREBP1)                  | Q9WTN3        | mouse monoclonal SREBP1 antibody                         | Santa Cruz Biotechnology, sc-13551  | 1:1000   |
| X-box-binding protein 1 (XBP1)                                        | O35426        | Rabbit monoclonal XBP1 antibody                          | Abcam ab220783                      | 1:500    |

|                                     |        |                                             |                                           |        |
|-------------------------------------|--------|---------------------------------------------|-------------------------------------------|--------|
| Lamin-A/C (LMNA)                    | P48678 | mouse monoclonal<br>LMNA antibody           | Santa Cruz<br>Biotechnology,<br>sc-376248 | 1:1000 |
| Alpha-tubulin 2<br>(Tubulin)        | P05213 | mouse monoclonal<br>tubulin antibody        | Abcam<br>ab7291                           | 1:2000 |
| Myc proto-oncogene<br>protein (Myc) | P01108 | mouse monoclonal<br>myc antibody            | Santa Cruz<br>Biotechnology,<br>sc-40     | 1:1000 |
| Beta-actin ( $\beta$ -actin)        | P60710 | mouse monoclonal<br>$\beta$ -actin antibody | Abcam,<br>ab8226                          | 1:2000 |
