# Supplementary material for: Protective Role of Hepassocin against Hepatic Endoplasmic Reticulum Stress in Mice
Source: Int J Mol Sci. 2022 Nov 1;23(21):13325. doi: 10.3390/ijms232113325 (PMC9658083; doi:10.3390/ijms232113325)
Supplement: Supplementary file 1 [file ijms-23-13325-s001.zip]

Archive with 6 entries (6 files):
- Supplementary figure legend.pdf
- Supplementary Figure S1.tif
- Supplementary Figure S2.tif
- Supplementary Figure S3.tif
- Supplementary Table S1.pdf
- Supplementary Table S2.pdf
